# Supplementary material for: Lactate Regulates Metabolic and Pro-inflammatory Circuits in Control of T Cell Migration and Effector Functions
Source: PLoS Biol. 2015 Jul 16;13(7):e1002202. doi: 10.1371/journal.pbio.1002202 (PMC4504715; doi:10.1371/journal.pbio.1002202)
Supplement: S1 Data — (XLSX) [file pbio.1002202.s001.xlsx]

## Sheet: Fig 1A
	OA	RA
	8.7204	8.49764
	7.45807	16.6657
	5.60169	13.844
	5.15616	14.141
		6.78977
		6.34424
		13.547
		11.0223
mean	6.73408	11.3565
SD	1.65748	3.80206

## Sheet: Fig 1B
	time (h)	UT			CXCL10			CXCL10+Lactic Acid			CXCL10+Sodium Lactate
Exp #1	2	23.3333	22.75	23.5	39.9583	29.4583	25.6667	40.25	47.25	31.2083	36.1667	30.3333	29.1667
Representative	4	32.9583	28.2917	33.67	58.0417	49.2917	52	55.7083	64.75	46.0833	35.3333	32.375	33.5417
	6	37.9167	40.25	42.86	59.2083	42.5833	44.625	33.25	70.2917	57.75	50.4583	30.625	41.4167
Exp #2	2	21.5833	16.9167	11.375	25.0833	24.5	29.4583	23.0417	23.0417	22.4583	22.75	18.6667	15.4583
	4	17.7917	17.2083	16.625	24.5	24.5	23.9167	23.9167	26.5417	21.5833	23.9167	15.1667	17.2083
	6	25.0833	28	21.875	37.0417	34.4167	37.0417	29.1667	39.0833	29.1667	27.7083	23.3333	25.0833
Exp #3	2	11.375	9.33333	11.6667	18.0833	18.6667	19.5417	19.8333	11.375	16.56	9.33333	11.6667	17.7917
	4	18.0833	18.0833	22.1667	34.125	33.5417	34.7083	28.5833	30.9167	38.2083	18.9583	21.2917	23.625
	6	28.5833	26.5417	32.0833	48.125	46.375	44.625	50.4583	44.625	36.4583	43.1667	44.3333	49.2917
Exp #4	2	23.3333	30.3333	23.625	28	44.625	32.375	34.125	34.7083	23.3333	26.5417	31.7917	18.9583
	4	30.0417	30.0417	29.75	31.7917	55.7083	35.5833	35	43.4583	36.1667	32.0833	27.125	26.25
	6	31.2083	34.4167	35.875	40.5417	47.5417	33.25	38.2083	38.5	39.9583	30.625	28.2917	30.0417
Cumulative migration data from 4 independent experiments (4h timepoint) expressed as % of UT
		CXCL10		CXCL10 + Lactic Acid		CXCL10 + Sodium Lactate
Exp #1		167.861		175.455		106.669
Exp #2		141.243		139.548		109.04
Exp #3		175.5		167.5		109.5
Exp #4		137.013		127.597		95.1299
mean		155.404		152.525		105.085
SD		19.1292		22.6555		6.75139

## Sheet: Fig 1C
	time (h)	UT			CXCL10			CXCL10+Lactic Acid			CXCL10+Sodium Lactate
Exp #1	2	15.1667	12.5417	16.0417	13.7083	19.8333	18.6667	17.5	17.2083	14.5833	19.8333	21.875	18.6667
Representative	4	21.5833	16.9167	11.375	25.0833	24.5	29.4583	15.17	18.6667	15.4583	23.0417	23.0417	22.4583
	6	17.7917	17.2083	16.625	24.5	24.5	23.9167	23.9167	22.75	17.2083	23.9167	26.5417	21.5833
Exp #2	2	7.29167	7	4.66667	18.6667	18.375	16.3333	10.5	9.91667	13.125	16.9167	19.25	15.4583
	4	16.0417	12.8333	13.125	17.5	22.75	28.2917	11.9583	14.2917	10.7917	21.875	25.0833	24.2083
	6	13.7083	12.8333	16.625	23.9167	23.0417	28.2917	14.875	13.125	15.1667	26.8333	25.9583	30.9167
Exp #3	2	18.96	15.75	14.58	30.92	37.92	26.25	16.3333	8.16667	12.8333	31.79	30.92	29.46
	4	30.92	37.33	36.17	49.29	61.25	51.04	17.5	18.6667	11.6667	46.08	60.67	49.29
	6	37.1	44.8	43.4	59.15	73.5	61.25	35	30.3333	44.3333	55.3	72.8	59.15
Cumulative migration data from 3 independent experiments (4h timepoint) expressed as % of UT
		CXCL10		CXCL10 + Lactic Acid		CXCL10 + Sodium Lactate
Exp #1		158.48		98.8371		137.427
Exp #2		163.194		88.1944		169.444
Exp #3		154.74		45.8086		149.435
mean		158.805		77.6134		152.102
SD		4.23636		28.0531		16.1745

## Sheet: Fig 1D
	time (h)	UT			CXCL10			CXCL10+1mM Sodium Lactate			CXCL10+5mM Sodium Lactate			CXCL10+10mM Sodium Lactate
Exp #1	2	2.17467	2.42009	3.41112	4.375	5.54167	3.8	4.08333	4.08333	4.3	2.91667	3.5	3.34	2.04167	1.75	1.67
	4	3.262	2.398	3.262	6.70833	7.58333	5.9	7	7.875	7.4	4.95833	6.41667	5.5	3.20833	3.79167	4.5
	6	1.96673	2.2872	2.90163	11.0833	10.7917	10.5	11.375	11.6667	10.9	5.54167	5.25	5.8	3.5	4.95833	4.86
Exp #2	2	4.85	5.67	4.75	11.8592	8.132	9.3625	8.0152	7.61133	7.61133	5.43667	6.524	6.22576	3.262	3.11288	3.80567
Representative	4	7.5	6.25	5.24	16.2283	14.3558	12.626	14.679	13.048	13.7936	10.3297	9.786	9.24233	7.06767	8.388	5.98033
	6	12.9167	12.0417	13.94	23.0942	23.7183	22.47	20.3176	21.203	21.7467	11.9607	10.252	10.8112	9.05904	9.24233	6.524
Exp #3	2	4.4784	3.29221	4.4784	7.0832	8.155	10.3297	8.73833	8.73833	9.202	6.24167	7.49	7.1476	3.5738	3.745	4.36917
	4	7.483	9.5265	8.13765	16.8525	14.98	15.836	10.9976	12.5043	14.1353	10.6108	11.235	11.77	9.63	6.86583	8.11417
	6	16.2945	14.225	15.7149	23.326	24.3425	24.9667	19.572	20.1157	20.6593	11.8592	12.412	13.7317	10.4004	7.49	10.6108
Cumulative migration data from 3 independent experiments (4h timepoint) expressed as % of UT
		CXCL10			CXCL10+1mM Sodium Lactate			CXCL10+5mM Sodium Lactate			CXCL10+10mM Sodium Lactate
Exp #1		226.313			249.664			189.139			128.895
Exp #2		227.542			218.645			154.597			112.88
Exp #3		189.558			149.668			133.677			97.864
mean		214.471			205.992			159.138			113.213
SD		21.5838			51.1844			28.0087			15.5181

## Sheet: Fig 1E
	time (h)	UT			CXCL10			pH7.2			pH6.2			pH5.4			pH4.5			HCl
Exp #1	4	17.5	32.6667	25.6667	50.75	49.875	45.2083	41.4167	49.5833	42	34.4167	36.4583	37.9167	17.7917	16.9167	18.9583	3.79167	7.29167	5.83333	49	59.5	67.6667
Exp #2	4	21.4278	19.4667	26.582	44.625	42.5833	40.5417	46.9583	39.0833	47.5417	25.6667	26.25	37.625	13.7083	15.1667	13.7083	14	11.0833	9.33333	43.57	45.0367	53.548
Exp #3	4	37.3407	30.3407	22.174	56.3	49.8823	54.549	46.0907	54.2573	47.466	39.0671	43.6706	41.3233	23.6323	21.4657	21.9067	8.5667	12.0657	9.50733	56.374	63.174	72.4307
Cumulative migration data from 3 independent experiments (4h timepoint) expressed as % of UT
		CXCL10	pH 7.2	pH6.2	pH5.4	pH4.5	HCl
Exp #1		192.308	175.385	143.462	70.7692	22.3077	232.308
Exp #2		189.325	197.97	132.701	63.1084	51.0055	210.673
Exp #3		178.878	164.502	138.067	74.5695	33.5425	213.653
mean		186.837	179.286	138.077	69.4824	35.6185	218.878
SD		7.05222	17.0717	5.38045	5.8379	14.4611	11.7255

## Sheet: Fig 2B
	time (h)	UT			CXCL10			Lactic Acid			CHC			Phloretin			Slc16a1 AB			Iso AB
Exp #1	4	10.2083	11.375	11.324	39.0833	33.5417	31.2083	18.9583	16.9167	21	29.4583	32.6667	31.5	29.4583	26.25	27.7917	26.25	28.2917	40.25	16.625	16.625	16.3333
Exp #2	4	10.5	5.25	9.55	29.75	31.5	32.65	10.5	14	14.3667	25.75	19.25	35	26.8902	28.1707	21.7683	24.0244	29.3171	22.9268	10.3333	14.65	10.4367
Exp #3	4	13.2516	12.0802	11.375	37.33	32.6754	40.338	13.125	17.5	18.125	29.3324	31.321	28.3381	31.25	36.875	29.375	31.2367	28.3381	31.321	13.224	20	17.5
Cumulative migration data from 3 independent experiments (4h timepoint) expressed as % of UT
		Cxcl10	Lactic Acid	CHC	Phloretin	Slc16a1 AB	Iso AB
Exp #1		315.533	172.834	284.511	253.743	288.056	150.676
Exp #2		371.146	153.623	316.206	303.673	301.456	140
Exp #3		300.607	132.809	242.438	265.618	247.626	138.187
mean		329.095	153.089	281.052	274.345	279.046	142.954
SD		37.1739	20.0177	37.005	26.0839	28.0231	6.74823

## Sheet: Fig 2C
	time (h)	UT			CXCL10			Lactic Acid			8nM AR-C155858			23nM AR-C155858			92nM AR-C155858
Exp #1	4	10.2083	11.375	12.45	20.125	21.2917	20.7083	7	3.5	3.5	18	22.75	15.4583	18.375	18.0833	24.5	21.875	20.4167	22.4583
Exp #2	4	30.9167	34.4167	30.3333	49.2917	61.25	51.0417	4.375	3.5	3.79167	49.2917	61.25	51.0417	46.0833	60.6667	49.2917	55.3	72.8	59.15
Exp #3	4	7	7.35	8.83333	16.0417	19.8333	21.875	8.45833	9.33333	6.70833	18.375	18.0833	24.5	17.7917	27.7083	21.5833	21.875	20.4167	22.4583
Cumulative migration data from 3 independent experiments (4h timepoint) expressed as % of UT
				AR-C155858
		CXCL10	Lactic Acid	8nM	23nM	92nM
Exp #1		182.542	41.1361	165.157	179.114	190.255
Exp #2		168.902	12.1951	168.902	163.11	195.732
Exp #3		249.101	105.679	262.94	289.36	279.296
mean		200.182	53.0035	199	210.528	221.761
SD		42.911	47.8587	55.4058	68.7382	49.9019

## Sheet: Fig 2D
	time (h)	UT			CXCL10			Sodium Lactate			Slc5a12 AB			Iso AB			sh Slc5a12 2002			sh Slc5a12 2004			sh LKO.1
Exp #1	4	10.2083	11.375	10.2083	17.2083	20.125	19	11.0833	14.2917	11	17.7917	20.7083	20.7083	12.8333	12.5417	15.1667	19.25	18.9583	17.2083	23.9167	22.4583	17.5	7.29167	10.7917	11.9583
Exp #2	4	12.25	13.25	10.2083	27.4167	23.625	25.6667	17.2083	14.875	10.5	29.1667	24.5	27.4167	15.75	14.2917	13.0417	21.875	22.4583	23.3333	27.7083	24.2083	20.7083	13.125	18.0833	14
Exp #3	4	27.6413	24.8062	24.8062	48.8162	46.17	41.9038	34.7288	26.73	26.9325	50.3212	50.3212	43.2338	29.185	30.4763	34.855	41.8162	44.7775	46.0687	58.7508	54.19	43.525	18.7751	26.2581	19.0587
Cumulative migration data from 3 independent experiments (4h timepoint) expressed as % of UT
						sh Slc5a12
		CXCL10	Sodium Lactate	Slc5a12 AB	Iso AB	2002	2004	sh LKO.1
Exp #1		177.195	114.417	186.239	127.523	174.312	200.917	94.4954
Exp #2		214.819	119.253	227.071	120.653	189.498	203.384	126.604
Exp #3		177.195	114.417	186.239	122.345	171.723	202.535	82.9629
mean		189.737	116.029	199.849	123.507	178.511	202.279	101.354
SD		21.7221	2.7923	23.5747	3.57914	9.60281	1.25301	22.6148

## Sheet: Fig 3A
	Hexokinase 1 (normalized to b-actin)
	UT	Cxcl10 2h	Cxcl10 4h	Cxcl10 + Sodium Lactate 2h	Cxcl10 + Sodium Lactate 4h
	0.975186	1.3006	1.28518	0.0056204	0.00500577
	0.98047	1.23896	0.400896	0.381415	0.0174016
	1.04673	1.40659	0.745913	0.962927	*1.91		*Outlier
	1.00392	1.12746	0.831142	0.396797	0.0167434
	1.01387	1.22333	1.0012	0.600725	0.784326
	1.12822	1.58998	0.460601	1.01749	0.258113
mean	1.02473	1.31449	0.787488	0.560829	0.216318
SD	0.0568489	0.163442	0.332659	0.384491	0.334825
	Aldolase A (normalized to b-actin)
	UT	Cxcl10 2h	Cxcl10 4h	Cxcl10 + Sodium Lactate 2h	Cxcl10 + Sodium Lactate 4h
	1.00469	0.992836	0.768334	0.849377	0.932649
	1.06819	1.16504	0.940974	0.621965	0.922897
	1.15361	1.15529	0.90516	1.01005	1.03577
	1.09542	1.06906	0.946693	0.556084	0.869419
	1.05188	1.13979	1.09874	0.888926	1.17784
	1.48344	1.67357	1.53077	1.13365	0.885363
mean	1.14287	1.19926	1.03178	0.843342	0.970658
SD	0.173956	0.24132	0.266232	0.22168	0.116976
	Enolase 1 (normalized to b-actin)
	UT	Cxcl10 2h	Cxcl10 4h	Cxcl10 + Sodium Lactate 2h	Cxcl10 + Sodium Lactate 4h
	1.31104	1.29706	1.14317	1.18599	1.02629
	0.819595	0.773618	0.970967	0.811994	1.32397
	1.14579	1.1209	1.0169	1.03829	0.934225
	0.841801	0.790627	0.887527	0.591784	0.640006
	0.951086	1.42311	1.25868	0.82979	0.701815
	1.09879	1.54419	1.20987	0.87468	0.752216
mean	1.02802	1.15825	1.08119	0.888754	0.89642
SD	0.19132	0.323375	0.14539	0.20419	0.255152
	Pyruvate Kinase M1/2 (normalized to b-actin)
	UT	Cxcl10 2h	Cxcl10 4h	Cxcl10 + Sodium Lactate 2h	Cxcl10 + Sodium Lactate 4h
	1.33322	1.44952	2.30576	1.56255	2.30448
	1.23634	1.25451	1.76934	1.40806	1.73141
	1.29311	1.55472	1.9832	1.69496	2.181
	0.705063	0.873987	1.38533	1.00246	1.16934
	1.03283	1.18799	1.87314	1.28004	1.57183
	0.500434	0.702299	1.33971	0.840798	0.406453
mean	1.01683	1.1705	1.77608	1.29814	1.56075
SD	0.343144	0.328625	0.367705	0.327529	0.700386

## Sheet: Fig 3B
		UT			CXCL10
Exp #1	Hk1	5.71	5.05	5.26	12.82	13.86	10.77
Representative	PkM2	27.78	29.17	31.39	73.78	70.18	49.7
	Glut1	27.71	29.11	27.02	39.41	38.55	43.54
	Glut2	19.05	27.94	18.16	40.74	50.43	59.14
	Glut3	40.24	41.16	36.2	86.72	82.31	64.25
	Glut4	54.42	52.48	52.67	139.5	120.71	115.2
		UT			CXCL10
Exp #2	Hk1	6.27738	3.99894	5.26471	7.35639	9.08558	10.5495
	PkM2	30.5544	23.0856	31.3904	60.957	65.7076	80.0435
	Glut1	20.6523	26.9295	22.3979	49.0364	24.1143	18.6977
	Glut2	12.5856	14.445	11.6168	29.4425	9.76778	8.84053
	Glut3	31.9507	30.0144	25.6431	62.3927	27.2142	20.8076
	Glut4	38.9257	33.5438	36.8304	86.122	48.6874	37.8658
		UT			CXCL10
Exp #3	Hk1	6.023	3.83689	5.05137	7.05829	8.7174	10.122
	PkM2	13.5122	17.8838	18.3731	46.8502	38.4593	35.6787
	Glut1	18.846	17.9563	21.0456	27.5263	30.8367	28.6898
	Glut2	9.01217	9.31315	11.2889	10.5231	14.58	19.2634
	Glut3	22.8789	23.4564	20.5579	22.3	25.8088	34.3164
	Glut4	26.2146	27.8735	29.5268	46.173	62.4492	30.7812
		UT		CXCL10
		mean	SD	mean	SD
Exp #1	Hk1	5.34	0.337194	12.4833	1.57227
	PkM2	29.4467	1.82083	64.5533	12.9887
	Glut1	27.9467	1.06491	40.5	2.6676
	Glut2	21.7167	5.4079	50.1033	9.20435
	Glut3	39.2	2.63848	77.76	11.906
	Glut4	53.19	1.06944	125.137	12.7404
		UT		CXCL10
		mean	SD	mean	SD
Exp #2	Hk1	5.18034	1.14156	8.99716	1.59839
	PkM2	28.3435	4.57257	68.9027	9.93631
	Glut1	23.3266	3.24003	30.6161	16.1807
	Glut2	12.8825	1.43728	16.0169	11.6361
	Glut3	29.2027	3.23119	36.8048	22.3901
	Glut4	36.4333	2.71286	57.5584	25.3216
		UT		CXCL10
		mean	SD	mean	SD
Exp #3	Hk1	4.97042	1.0953	8.63257	1.53362
	PkM2	16.5897	2.67637	40.3294	5.81581
	Glut1	19.2826	1.59025	29.0176	1.67939
	Glut2	9.8714	1.23676	14.7888	4.37384
	Glut3	22.2977	1.53415	27.4751	6.17905
	Glut4	27.8716	1.65605	46.4678	15.836

[truncated: 18 more sheets: Fig 3C, Fig 3D, Fig 3E, Fig 3F, Fig 3G, Fig 3H, Fig 4A, Fig 4B, Fig 4C, Fig 4D, Fig 5B, Fig 5C, Fig 5D, Fig 5E, Fig 6A, Fig 6B, Fig 6C, Sheet1]
