# Supplementary material for: Lactate Regulates Metabolic and Pro-inflammatory Circuits in Control of T Cell Migration and Effector Functions
Source: PLoS Biol. 2015 Jul 16;13(7):e1002202. doi: 10.1371/journal.pbio.1002202 (PMC4504715; doi:10.1371/journal.pbio.1002202)
Supplement: S2 Data — (XLSX) [file pbio.1002202.s002.xlsx]

## Sheet: Fig S1A
	time (h)	UT			CCL5			CCL5+Lactic Acid			CCL5+Sodium Lactate
Exp #1	2	3.20833	3.79167	4.05	4.66667	5.25	5.6	4.08333	4.95833	4.43	1.16667	0.875	1.3
Representative	4	4.5	4.375	4.66667	6	7.58333	9.625	8.7	6.70833	9.625	1.86	2.91667	1.45833
	6	6.125	3.79167	5.362	9.91667	10.5	11.4	12.5417	13.4167	12.87	3.79167	3.79167	3.24
Exp #2	2	11.36	11.75	10.4	18.94	17.37	19.55	9.43	11.27	11.67	10.4414	8.59881	9.32883
	4	18.8333	17.7333	20.6667	33.198	34.2672	30.4461	20.9583	21.2917	23.625	20.2686	14.1266	18.3207
	6	25.8333	24.4167	27.18	43.9448	45.686	46.9257	44.55	46.2917	43.6667	28.2532	26.4106	27.102
Exp #3	2	7	4.66667	7.29167	16.9167	15.1667	17.7917	18.6667	14.875	17.2083	10.5	7.30417	4.52
	4	13.7083	12.8333	12.8333	24.5	28.2917	28.2917	28	25.0833	27.1667	13.125	11.9583	13.125
	6	16.0417	16.625	13.125	34.4167	33.9167	33.1667	39.0833	32.3333	37.0417	21.875	15.4583	17.5
Cumulative migration data from 3 independent experiments (4h timepoint) expressed as % of UT
		CCL5		CCL5 + Lactic Acid		CCL5 + Sodium Lactate
Exp #1		171.385		184.862		46.0431
Exp #2		171.074		115.099		92.1071
Exp #3		205.926		203.81		97.037
mean		182.795		167.923		78.3957
SD		20.0326		46.7179		28.1265

## Sheet: Fig S1B
	time (h)	UT			CXCL10 + Lactic Acid			CXCL10 + Sodium Lactate
Exp #1	2	25	24	24	24.375	22.5	22.625	22	27	25
	4	26	27	27	24.5	25.375	24.125	28	22	27
	24	24	24	28	23.75	26.375	26.875	29	25	29
Exp #2	2	30	30	30	30	30	30	30	30	30
	4	31	27	23	33.125	29.625	31.25	27	45	25
	24	29	24	28	24.5	23.625	26.75	28	26	30
Exp #3	2	33	27	26	26.625	34.125	21.25	27	31	25
	4	26	25	28	27	23	31	24	28	31
	24	26	27	31	29	28	30	26	33	29
Cumulative data from 3 independent experiments
		UT			CXCL10 + Lactic Acid			CXCL10 + Sodium Lactate
time (h)		2	4	24	2	4	24	2	4	24
Exp #1		24.3333	26.6667	25.3333	23.1667	24.6667	25.6667	24.6667	25.6667	27.6667
Exp #2		30	27	27	30	31.3333	24.9583	30	32.3333	28
Exp #3		28.6667	26.3333	28	27.3333	27	29	27.6667	27.6667	29.3333
mean		27.6667	26.6667	26.7778	26.8333	27.6667	26.5417	27.4444	28.5556	28.3333
SD		2.96273	0.333333	1.34715	3.444	3.38296	2.15824	2.6736	3.42107	0.881917

## Sheet: Fig S2A
		Th0 UT			sh Slc5a12 2002			sh Slc5a12 2004			sh LKO.1
Exp #1		1.37	1	1.44	0.14	0	0.08	0.25	0.04	0.11	0.48	2.1	0.38
Representative
Exp #2		1.25	0.99	0.89	0.25	0.13	0.22	0.31	0.12	0.09	0.76	1.24	1.53
Exp #3		0.86	1.14	1.32	0.16	0.31	0.24	0.23	0.19	0.22	0.87	1.32	0.98
		Th0 UT		sh Slc5a12 2002		sh Slc5a12 2004		sh LKO.1
		mean	SD	mean	SD	mean	SD	mean	SD
Exp #1		1.27	0.236432	0.0733333	0.0702377	0.133333	0.106927	0.986667	0.965471
Exp #2		1.04333	0.185831	0.2	0.06245	0.173333	0.119304	1.17667	0.388887
Exp #3		1.10667	0.231805	0.236667	0.0750555	0.213333	0.0208167	1.05667	0.234592

## Sheet: Fig S2B
	time (h)	UT			CXCL10			CXCXL10 + Lactic Acid			Slc5a12 AB			Iso AB
Exp #1	4	24.6458	11.375	20.8542	47.3958	49.2917	39.8125	26.5417	24.6458	28.4375	17.0625	11.375	30.3333	13.2708	26.5417	17.0625
Exp #2	4	15.75	18.0833	13.4167	39.0833	33.5417	31.2083	18.9583	16.9167	21	12.8333	13.4167	12.8333	16.625	16.625	16.3333
Exp #3	4	16.18	15.12	14.14	26.46	29.295	33.075	20.79	16.065	20.79	20.79	25.515	23.625	15.1667	9.91667	13.4167
Cumulative migration data from 3 independent experiments (4h timepoint) expressed as % UT
		CXCL10		CXCL10 + Lactic Acid		Slc5a12 AB		Iso AB
Exp #1		240		140		103.333		100
Exp #2		219.753		120.37		82.716		104.938
Exp #3		195.489		126.86		153.895		84.7271
mean		218.414		129.077		113.315		96.5551
SD		22.2859		10.0009		36.6243		10.5367
	time (h)	UT			CXCL10			CXCL10 + Lactic Acid			sh Slc5a12 2002			sh Slc5a12 2004			sh LKO.1
Exp #1	4	32.9583	34.125	35.2917	46.6667	42	49	29.1667	31.5	36.4583	28.5833	20.7083	28	24.2083	22.4583	25.6667	25.6667	20.4167	29.75
Exp #2	4	18.9583	15.75	14.5833	30.9167	37.9167	26.25	16.3333	14.875	10.7917	13.4167	15.1667	16.0417	10.7917	10.2083	10.5	12.95	12.25	12.6
Exp #3	4	25.375	18.0833	21.875	33.8333	34.7083	36.4583	22.4583	23.3333	19.8333	22.1667	18.0833	20.125	19.5417	21	20.7083	15.4583	14	14
Cumulative migration data from 3 independent experiments (4h timepoint) expressed as % UT
		CXCL10			CXCL10 + Lactic Acid			sh Slc5a12 2002			sh Slc5a12 2004			LKO.1
Exp #1		134.473			94.8718			75.4986			70.6553			74.0741
Exp #2		192.899			85.2071			90.5325			63.9053			76.6864
Exp #3		160.714			100.446			92.4107			93.75			66.5179
mean		162.696			93.5084			86.1473			76.1035			72.4261
SD		29.2636			7.71059			9.26974			15.6505			5.28078

## Sheet: Fig S2C
	time (h)	UT			CXCL10			Sodium Lactate			CHC			Phloretin
Exp #1	4	37.3333	45.5	47.8333	77	72.3333	74.6667	54.8333	47.8333	44.3333	59.5	59.5	65.3333	56	52.5	47.8333
Exp #2	4	20.7083	18.9583	19.5417	38.2083	38.5	39.9583	31.2083	27.4167	28.875	30.625	28.2917	27.0417	32.9583	26.5417	30.4167
Exp #3	4	16.625	19.25	17.2083	35	43.4583	36.1667	26.0417	28.0417	29.75	30.2917	28.5833	26.25	31.7917	25.7083	33.5833
Cumulative migration data from 3 independent experiments (4h timepoint) expressed as % UT
		CXCL10		Sodium Lactate		CHC		Phloretin
Exp #1		171.429		112.5		141.071		119.643
Exp #2		197.044		147.783		145.179		151.865
Exp #3		215.934		157.928		160.361		171.586
mean		194.802		139.404		148.871		147.698
SD		22.3373		23.845		10.1608		26.2209
	time (h)	UT			CXCL10			Sodium Lactate			Slc16a1 AB			Iso AB			AR-C155858
Exp #1	4	26.25	23.9167	26.25	30.3333	32.9583	33.5417	23.3333	18.9583	23.0417	23.9167	21.875	25.375	23.9167	21.875	23.0417	8.75	5.83333	3.79167
Exp #2	4	15.1667	16.9167	14.5833	29.47	31.9258	32.5398	7	12.25	14.2917	14.875	15.4583	14	15.1667	14.5833	16.9167	9.20833	13.2083	11.5
Exp #3	4	18.0833	18.0833	22.1667	34.125	33.5417	34.7083	18.0833	18.6667	19.5417	19.8333	11.375	18.2083	14	19.25	18.375	14.2917	10.5	11.375
Cumulative migration data from 3 independent experiments (4h timepoint) expressed as % UT
		CXCL10		Sodium Lactate		Slc16a1 AB		Iso AB		AR-C155858
Exp #1		126.718		85.4962		93.1298		90.0763		24.0458
Exp #2		201.291		71.875		95		100		72.6786
Exp #3		175.5		96.5		84.7143		88.5		62
mean		167.836		84.6237		90.948		92.8588		52.9081
SD		37.8726		12.3357		5.47896		6.2345		25.5594

## Sheet: Fig S3A
	Hexokinase 1 (normalized to b-actin)
	UT	Cxcl10 2h	Cxcl10 4h	Cxcl10 + Lactic Acid 2h	Cxcl10 + Lactic Acid 4h
	0.874543	0.965909	0.737264	1.30293	1.41057
	0.848283	1.04295	0.67526	1.32507	1.50015
	1.74812	1.82501	2.03767	2.14236	1.61293
	1.01192	1.00929	0.720052	1.21902	1.32974
	0.892429	0.274152	0.745992	0.541927	0.773582
	1.07097	1.15128	0.788144	1.39199	1.48891
mean	1.07438	1.04476	0.950731	1.32055	1.35265
SD	0.341175	0.494256	0.533753	0.509386	0.299087
	Aldolase A (normalized to b-actin)
	UT	Cxcl10 2h	Cxcl10 4h	Cxcl10 + Lactic Acid 2h	Cxcl10 + Lactic Acid 4h
	0.972428	1.0476	1.14214	1.33557	1.44776
	1.1297	1.14328	1.45315	1.72868	1.5661
	1.22711	1.25093	1.35918	1.6183	1.9551
	1.1052	1.14415	1.45149	1.6844	1.18349
	1.48894	1.5157	1.63737	1.72708	1.41799
	1.56634	1.78168	1.42	1.62186	1.94885
mean	1.24829	1.31389	1.41055	1.61931	1.58655
SD	0.232446	0.280126	0.161064	0.147193	0.309075
	Enolase 1 (normalized to b-actin)
	UT	Cxcl10 2h	Cxcl10 4h	Cxcl10 + Lactic Acid 2h	Cxcl10 + Lactic Acid 4h
	1.40691	1.33238	1.42847	1.59845	2.16732
	1.35733	1.52761	1.58375	1.70626	1.22457
	1.1814	1.22474	1.22039	1.33401	1.77405
	1.74427	1.82347	1.93589	1.47859	1.61097
	1.76299	2.44232	2.50238	1.76018	1.90361
	1.25351	1.34295	1.33352	1.35922	1.54214
mean	1.45107	1.61558	1.6674	1.53945	1.70378
SD	0.247283	0.456451	0.478467	0.178	0.323766
	Pyruvate Kinase M1/2 (normalized to b-actin)
	UT	Cxcl10 2h	Cxcl10 4h	Cxcl10 + Lactic Acid 2h	Cxcl10 + Lactic Acid 4h
	1.10679	0.996722	1.20576	1.16619	1.17983
	1.02153	1.05255	1.14058	0.956851	1.04533
	1.76432	1.73828	1.55389	1.5135	1.55819
	0.589109	0.530551	0.690207	0.948393	1.11368
	0.795951	0.781256	0.910709	1.16992	1.35591
	0.656911	0.857504	0.880027	1.11659	0.724934
mean	0.989101	0.99281	1.06353	1.14524	1.16298
SD	0.429773	0.408916	0.304307	0.205777	0.283499

## Sheet: Fig S3B
		UT			CXCL10
Exp #1	Hk1	0.08	0.05	0.06	0.1	0.06	0.09
Representative	PkM2	0.98	0.73	0.75	1.39	0.76	0.78
	Glut1	26.58	26.37	28.5	32.03	31.16	29.87
	Glut2	0.85	0.88	0.85	1.04	0.86	0.9
	Glut3	25.59	24.56	27.1	29.82	28.84	32.29
	Glut4	2.38	2.21	2.51	2.83	3.72	2.91
Exp #2	Hk1	3.02624	1.98572	2.16066	3.76767	2.13238	3.27028
	PkM2	3.57628	2.65683	2.73747	3.2839	2.75578	2.8489
	Glut1	35.5178	24.7708	26.5654	43.4073	27.6837	33.6542
	Glut2	1.14216	0.826117	0.789418	1.41153	0.76183	1.011
	Glut3	34.1869	23.064	25.2599	40.4188	25.6219	36.375
	Glut4	3.1785	2.0793	2.33638	3.8424	3.30659	3.27308
Exp #3	Hk1	0.357068	0.272171	0.267561	0.399861	0.227711	0.318748
	PkM2	3.36248	3.06085	3.59072	3.7524	4.56985	3.56317
	Glut1	28.686	19.289	19.2826	31.8857	20.7351	29.3945
	Glut2	0.60261	0.449773	0.419255	0.781622	0.460972	0.613641
	Glut3	23.767	19.1065	19.3663	31.4933	19.6962	25.4811
	Glut4	2.11583	1.67266	1.49303	2.60706	2.07209	2.33609
		UT		CXCL10
		mean	SD	mean	SD
Exp #1	Hk1	0.0633333	0.0152753	0.0833333	0.0208167
	PkM2	0.82	0.138924	0.976667	0.358097
	Glut1	27.15	1.17384	31.02	1.08678
	Glut2	0.86	0.0173205	0.933333	0.0945163
	Glut3	25.75	1.27754	30.3167	1.77782
	Glut4	2.36667	0.150444	3.15333	0.492375
		UT		CXCL10
		mean	SD	mean	SD
Exp #2	Hk1	2.39088	0.557152	3.05677	0.83829
	PkM2	2.99019	0.509163	2.96286	0.281897
	Glut1	28.9513	5.75706	34.915	7.93727
	Glut2	0.919231	0.193931	1.06146	0.327775
	Glut3	27.5036	5.89114	34.1385	7.64778
	Glut4	2.53139	0.574962	3.47402	0.319465
		UT		CXCL10
		mean	SD	mean	SD
Exp #3	Hk1	0.298933	0.0503985	0.31544	0.0861228
	PkM2	3.33802	0.265781	3.96181	0.535012
	Glut1	22.4192	5.42723	27.3384	5.8527
	Glut2	0.490546	0.0982422	0.618745	0.160386
	Glut3	20.7466	2.61901	25.5569	5.8989
	Glut4	1.76051	0.320557	2.33842	0.267495

## Sheet: Fig S3C
6-NBDG		UT			2-DG			Sodium Lactate			Lactic Acid
Exp #1		0.4527	0.4428	0.4512	0.3755	0.3937	0.3937	0.4445	0.4336	0.4329	0.3765	0.3745	0.382
Exp #2		0.4483	0.4427	0.4332	0.3755	0.3937	0.3459	0.4734	0.4319	0.4075	0.3459	0.3861	0.3459
Exp #3		0.4591	0.406	0.4335	0.3755	0.3459	0.3755	0.4246	0.4354	0.4426	0.3735	0.3459	0.3815
2-NBDG		UT			2-DG			Sodium Lactate			Lactic Acid
Exp #1		0.2776	0.3324	0.4225	0.4625	0.4598	0.2749	0.3923	0.2569	0.4397	0.4446	0.3194	0.4231
Exp #2		0.3768	0.2524	0.2682	0.456	0.419	0.418	0.2502	0.3667	0.3479	0.402	0.4533	0.4095
Exp #3		0.4159	0.2672	0.2265	0.4476	0.2607	0.415	0.2264	0.3881	0.2257	0.2864	0.3925	0.4565
Cumulative data from 3 independent experiments
6-NBDG		UT	2-DG	Sodium Lactate	Lactic Acid		2-NBDG	UT	2-DG	Sodium Lactate	Lactic Acid
Exp #1		0.4489	0.387633	0.437	0.377667			0.344167	0.399067	0.362967	0.3957
Exp #2		0.4414	0.3717	0.4376	0.3593			0.299133	0.431	0.3216	0.4216
Exp #3		0.432867	0.3826	0.4342	0.366967			0.3032	0.374433	0.280067	0.378467
mean		0.441056	0.380644	0.436267	0.367978			0.3155	0.4015	0.321544	0.398589
SD		0.00802221	0.00814469	0.00181475	0.00922499			0.0249092	0.0283617	0.04145	0.0217113

## Sheet: Fig S3D
Exp #1	time	UT			2-DG			Metformin			Etomoxir			Rapamycin				UT		2-DG		Metformin		Etomoxir		Rapamycin
	(min)																	mean	SD	mean	SD	mean	SD	mean	SD	mean	SD
	0	4	0	2	1	4	3	2	5	5	2	6	6	3	4	6		2	2	2.66667	1.52753	4	1.73205	4.66667	2.3094	4.33333	1.52753
Representative		2	1	2	3	4	3	2	6	4	3	5	4	4	4	6		1.66667	0.57735	3.33333	0.57735	4	2	4	1	4.66667	1.1547
		2	0	2	2	3	3	1	5	4	3	3	3	4	3	4		1.33333	1.1547	2.66667	0.57735	3.33333	2.08167	3	0	3.66667	0.57735
	20	1	0	2	2	3	1	2	4	4	4	2	2	4	2	3		1	1	2	1	3.33333	1.1547	2.66667	1.1547	3	1
		1	-1	2	2	2	1	-1	3	3	2	1	2	2	2	3		0.666667	1.52753	1.66667	0.57735	1.66667	2.3094	1.66667	0.57735	2.33333	0.57735
		34	37	41	33	39	37	39	37	32	34	37	39	32	32	37		37.3333	3.51188	36.3333	3.05505	36	3.60555	36.6667	2.51661	33.6667	2.88675
	40	31	36	36	32	38	36	38	36	31	30	36	38	31	31	36		34.3333	2.88675	35.3333	3.05505	35	3.60555	34.6667	4.16333	32.6667	2.88675
		31	34	35	32	38	34	38	34	29	30	34	38	29	29	34		33.3333	2.08167	34.6667	3.05505	33.6667	4.50925	34	4	30.6667	2.88675
		32	34	36	32	38	34	38	34	30	31	34	38	30	30	34		34	2	34.6667	3.05505	34	4	34.3333	3.51188	31.3333	2.3094
	60	31	33	36	32	38	33	38	33	29	31	33	38	29	29	33		33.3333	2.51661	34.3333	3.21455	33.3333	4.50925	34	3.60555	30.3333	2.3094
		30	33	35	31	37	33	37	33	28	30	33	37	28	28	33		32.6667	2.51661	33.6667	3.05505	32.6667	4.50925	33.3333	3.51188	29.6667	2.88675
		34	32	37	6	6	3	40	42	45	28	48	44	28	37	38		34.3333	2.51661	5	1.73205	42.3333	2.51661	40	10.583	34.3333	5.50757
	80	30	33	34	4	5	4	34	49	52	28	51	46	18	39	39		32.3333	2.08167	4.33333	0.57735	45	9.64365	41.6667	12.0968	32	12.1244
		31	28	35	5	4	5	35	48	43	27	43	39	20	32	34		31.3333	3.51188	4.66667	0.57735	42	6.55744	36.3333	8.32666	28.6667	7.57188
		31	29	33	5	6	4	37	46	40	28	42	38	20	30	32		31	2	5	1	41	4.58258	36	7.2111	27.3333	6.4291
	100	29	28	33	5	4	4	34	43	41	27	43	38	18	28	31		30	2.64575	4.33333	0.57735	39.3333	4.72582	36	8.18535	25.6667	6.80686
		27	28	32	3	6	4	33	45	41	27	44	37	17	26	28		29	2.64575	4.33333	1.52753	39.6667	6.1101	36	8.544	23.6667	5.85947
		26	26	33	1	3	4	31	45	39	25	41	37	15	24	26		28.3333	4.04145	2.66667	1.52753	38.3333	7.02377	34.3333	8.32666	21.6667	5.85947
	120	26	27	32	1	3	3	31	41	39	24	41	37	14	22	24		28.3333	3.21455	2.33333	1.1547	37	5.2915	34	8.88819	20	5.2915
		26	26	30	1	2	3	31	43	37	25	41	36	13	21	23		27.3333	2.3094	2	1	37	6	34	8.18535	19	5.2915
		25	27	32	3	3	4	31	43	39	25	41	37	14	21	22		28	3.60555	3.33333	0.57735	37.6667	6.1101	34.3333	8.32666	19	4.3589
	140	24	26	30	2	2	0	30	42	37	24	39	35	11	18	19		26.6667	3.05505	1.33333	1.1547	36.3333	6.02771	32.6667	7.76745	16	4.3589
		24	26	30	2	2	2	30	41	37	24	39	35	10	17	18		26.6667	3.05505	2	0	36	5.56776	32.6667	7.76745	15	4.3589
		23	24	29	0	0	1	27	40	37	23	37	35	8	13	15		25.3333	3.21455	0.333333	0.57735	34.6667	6.80686	31.6667	7.57188	12	3.60555
	160	23	24	29	1	1	0	28	39	36	22	36	35	8	12	14		25.3333	3.21455	0.666667	0.57735	34.3333	5.68624	31	7.81025	11.3333	3.05505
		22	25	30	2	2	0	28	40	37	23	38	36	8	12	15		25.6667	4.04145	1.33333	1.1547	35	6.245	32.3333	8.14453	11.6667	3.51188
		22	23	29	2	1	-3	28	39	36	22	36	34	7	10	12		24.6667	3.78594	0	2.64575	34.3333	5.68624	30.6667	7.57188	9.66667	2.51661
	180	21	24	29	1	2	-3	27	40	36	22	37	34	5	9	11		24.6667	4.04145	0	2.64575	34.3333	6.65833	31	7.93725	8.33333	3.05505
		21	23	28	0	1	2	26	37	35	21	36	33	4	7	9		24	3.60555	1	1	32.6667	5.85947	30	7.93725	6.66667	2.51661
		21	24	28	1	1	0	26	39	35	22	36	33	4	7	9		24.3333	3.51188	0.666667	0.57735	33.3333	6.65833	30.3333	7.37111	6.66667	2.51661
	200	21	23	27	1	1	-2	26	38	34	21	35	33	4	6	7		23.6667	3.05505	0	1.73205	32.6667	6.1101	29.6667	7.57188	5.66667	1.52753
		21	23	28	1	3	-1	25	38	35	21	35	34	3	6	7		24	3.60555	1	2	32.6667	6.80686	30	7.81025	5.33333	2.08167
		21	24	28	1	3	0	26	39	35	21	36	34	3	5	7		24.3333	3.51188	1.33333	1.52753	33.3333	6.65833	30.3333	8.14453	5	2
	220	20	23	28	2	2	1	26	38	35	20	34	34	3	4	6		23.6667	4.04145	1.66667	0.57735	33	6.245	29.3333	8.0829	4.33333	1.52753
		19	22	28	2	2	-2	25	38	33	21	34	34	2	4	6		23	4.58258	0.666667	2.3094	32	6.55744	29.6667	7.50555	4	2
Exp #2	time																	UT		2-DG		Metformin		Etomoxir		Rapamycin
	(min)																	mean	SD	mean	SD	mean	SD	mean	SD	mean	SD
	0	3	7	5	7	6	4	5	8	8	9	5	9	9	6	7		5	2	5.66667	1.52753	7	1.73205	7.66667	2.3094	7.33333	1.52753
		4	5	5	7	6	6	5	9	7	8	6	7	9	7	7		4.66667	0.57735	6.33333	0.57735	7	2	7	1	7.66667	1.1547
		3	5	5	6	6	5	4	8	7	6	6	6	7	7	6		4.33333	1.1547	5.66667	0.57735	6.33333	2.08167	6	0	6.66667	0.57735
	20	3	4	5	6	4	5	5	7	7	5	7	5	6	7	5		4	1	5	1	6.33333	1.1547	5.66667	1.1547	6	1
		2	4	5	5	4	5	2	6	6	4	5	5	6	5	5		3.66667	1.52753	4.66667	0.57735	4.66667	2.3094	4.66667	0.57735	5.33333	0.57735
		41	45	37	43	41	43	41	36	38	41	43	36	36	41	35		41	4	42.3333	1.1547	38.3333	2.51661	40	3.60555	37.3333	3.21455
	40	40	40	36	42	40	42	40	35	34	40	42	35	35	40	34		38.6667	2.3094	41.3333	1.1547	36.3333	3.21455	39	3.60555	36.3333	3.21455
		38	39	36	42	38	42	38	33	34	38	42	33	33	38	32		37.6667	1.52753	40.6667	2.3094	35	2.64575	37.6667	4.50925	34.3333	3.21455
		38	40	36	42	38	42	38	34	35	38	42	34	34	38	32		38	2	40.6667	2.3094	35.6667	2.08167	38	4	34.6667	3.05505
	60	37	40	36	42	37	42	37	33	35	37	42	33	33	37	33		37.6667	2.08167	40.3333	2.88675	35	2	37.3333	4.50925	34.3333	2.3094
		37	39	35	41	37	41	37	32	34	37	41	32	32	37	40		37	2	39.6667	2.3094	34.3333	2.51661	36.6667	4.50925	36.3333	4.04145
		35	37	40	9	6	9	43	45	48	51	31	47	41	31	37		37.3333	2.51661	8	1.73205	45.3333	2.51661	43	10.583	36.3333	5.03322
	80	36	33	37	8	7	7	37	52	55	54	31	49	42	21	42		35.3333	2.08167	7.33333	0.57735	48	9.64365	44.6667	12.0968	35	12.1244
		31	34	38	7	8	8	38	51	46	46	30	42	37	23	35		34.3333	3.51188	7.66667	0.57735	45	6.55744	39.3333	8.32666	31.6667	7.57188
		32	34	36	9	7	8	40	49	43	45	31	41	35	23	33		34	2	8	1	44	4.58258	39	7.2111	30.3333	6.4291
	100	31	32	36	7	7	8	37	46	44	46	30	41	34	21	31		33	2.64575	7.33333	0.57735	42.3333	4.72582	39	8.18535	28.6667	6.80686
		31	30	35	9	7	6	36	48	44	47	30	40	31	20	29		32	2.64575	7.33333	1.52753	42.6667	6.1101	39	8.544	26.6667	5.85947
		29	29	36	6	7	4	34	48	42	44	28	40	29	18	27		31.3333	4.04145	5.66667	1.52753	41.3333	7.02377	37.3333	8.32666	24.6667	5.85947
	120	30	29	35	6	6	4	34	44	42	44	27	40	27	17	25		31.3333	3.21455	5.33333	1.1547	40	5.2915	37	8.88819	23	5.2915
		29	29	33	5	6	4	34	46	40	44	28	39	26	16	24		30.3333	2.3094	5	1	40	6	37	8.18535	22	5.2915
		30	28	35	6	7	6	34	46	42	44	28	40	25	17	24		31	3.60555	6.33333	0.57735	40.6667	6.1101	37.3333	8.32666	22	4.3589
	140	29	27	33	5	3	5	33	45	40	42	27	38	22	14	21		29.6667	3.05505	4.33333	1.1547	39.3333	6.02771	35.6667	7.76745	19	4.3589
		29	27	33	5	3	5	33	44	40	42	27	38	21	13	20		29.6667	3.05505	4.33333	1.1547	39	5.56776	35.6667	7.76745	18	4.3589
		27	26	32	3	3	3	30	43	40	40	26	38	18	11	16		28.3333	3.21455	3	0	37.6667	6.80686	34.6667	7.57188	15	3.60555
	160	27	26	32	4	3	4	31	42	39	39	25	38	17	11	15		28.3333	3.21455	3.66667	0.57735	37.3333	5.68624	34	7.81025	14.3333	3.05505
		28	25	33	5	3	5	31	43	40	41	26	39	18	11	15		28.6667	4.04145	4.33333	1.1547	38	6.245	35.3333	8.14453	14.6667	3.51188
		26	25	32	4	0	5	31	42	39	39	25	37	15	10	13		27.6667	3.78594	3	2.64575	37.3333	5.68624	33.6667	7.57188	12.6667	2.51661
	180	27	24	32	5	0	4	30	43	39	40	25	37	14	8	12		27.6667	4.04145	3	2.64575	37.3333	6.65833	34	7.93725	11.3333	3.05505
		26	24	31	4	5	3	29	40	38	39	24	36	12	7	10		27	3.60555	4	1	35.6667	5.85947	33	7.93725	9.66667	2.51661
		27	24	31	4	3	4	29	42	38	39	25	36	12	7	10		27.3333	3.51188	3.66667	0.57735	36.3333	6.65833	33.3333	7.37111	9.66667	2.51661
	200	26	24	30	4	1	4	29	41	37	38	24	36	10	7	9		26.6667	3.05505	3	1.73205	35.6667	6.1101	32.6667	7.57188	8.66667	1.52753
		26	24	31	6	2	4	28	41	38	38	24	37	10	6	9		27	3.60555	4	2	35.6667	6.80686	33	7.81025	8.33333	2.08167
		27	24	31	6	3	4	29	42	38	39	24	37	10	6	8		27.3333	3.51188	4.33333	1.52753	36.3333	6.65833	33.3333	8.14453	8	2
	220	26	23	31	5	4	5	29	41	38	37	23	37	9	6	7		26.6667	4.04145	4.66667	0.57735	36	6.245	32.3333	8.0829	7.33333	1.52753
		25	22	31	5	1	5	28	41	36	37	24	37	9	5	7		26	4.58258	3.66667	2.3094	35	6.55744	32.6667	7.50555	7	2

## Sheet: Fig S3F
	time (h)	UT			CCL19 / 21			2-DG			Rapamycin			Metformin
Exp #1	4	4.2	4.31667	3.61667	20.3	19.95	21.1167	4.08333	3.73333	4.2	7.26667	8.43333	7.03333	15.1667	12.95	11.6667
Exp #2	4	5.9535	8.7885	5.9535	39.9735	31.752	32.0355	9.3555	8.7885	9.072	17.25	18.026	17.459	25.015	27.1695	24.8705
Exp #3	4	9.56667	8.05	4.9	28.6667	29.1333	29.95	7.46667	5.6	4.66667	15.2833	19.6	19.0167	12.7167	14.1167	13.1833
Cumulative migration data from 3 independent experiments (4h timepoint) expressed as % UT
		CCL19/21		2-DG		Rapamycin		Metformin
Exp #1		505.769		99.0385		187.363		327.885
Exp #2		501.37		131.507		254.814		372.327
Exp #3		389.711		78.7565		239.378		177.72
AV		465.617		103.101		227.185		292.644
SD		65.7729		26.6088		35.3401		101.977

[truncated: 1 more sheets: Fig S6]
